# Supplementary material
Source: publisher figshare collection journal article supplement (https://sage.figshare.com/ndownloader/files/22659068)
Supplement: Supplementary file 1 [file 22659068]

**Toxicology Research and Application**

**“Olive oil limited motor disruption and neuronal damage in parkinsonism induced by MPTP administration”**


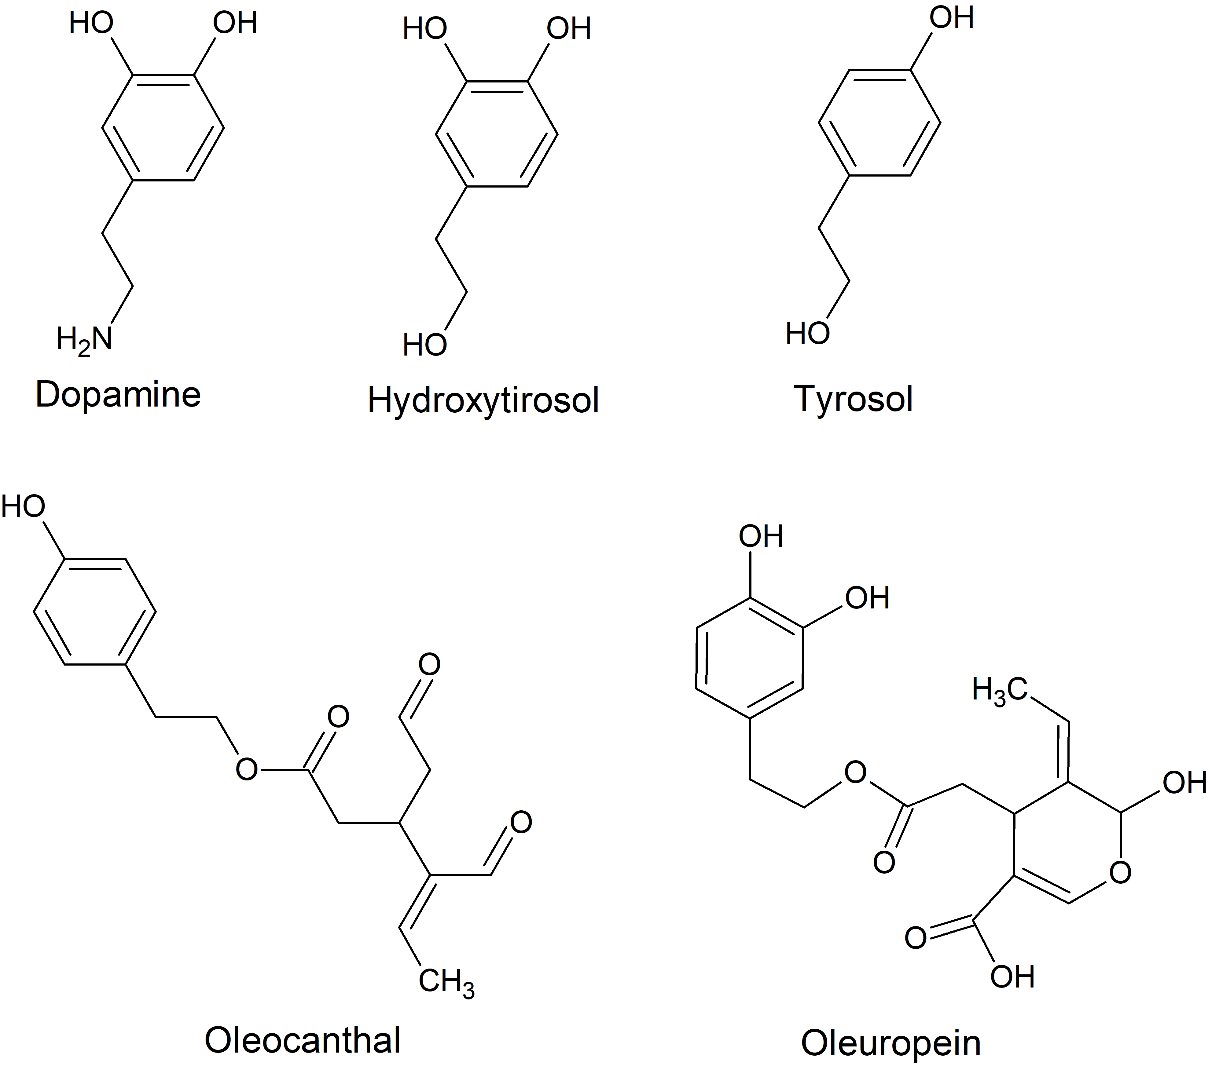


**Suppl. Fig. 1.** Chemical structures of dopamine and olive oil compounds, which showed a potential effect on ameliorating the MPTP acute toxicity in C57BL6 mice.
